# Supplementary material
Source: PubMed Central journal article supplement (PMC8080416)
Supplement: mmc1.pdf [file mmc1.pdf]

**Supplemental information**

**Notch4 signaling limits regulatory T-cell-mediated  
tissue repair and promotes severe lung  
inflammation in viral infections**

**Hani Harb, Mehdi Benamar, Peggy S. Lai, Paola Contini, Jason W. Griffith, Elena Crestani, Klaus Schmitz-Abe, Qian Chen, Jason Fong, Luca Marri, Gilberto Filaci, Genny Del Zotto, Novalia Pishesha, Stephen Kolifrath, Achille Broggi, Sreya Ghosh, Metin Yusuf Gelmez, Fatma Betul Oktelik, Esin Aktas Cetin, Ayca Kiykim, Murat Kose, Ziwei Wang, Ye Cui, Xu G. Yu, Jonathan Z. Li, Lorenzo Berra, Emmanuel Stephen-Victor, Louis-Marie Charbonnier, Ivan Zanoni, Hidde Ploegh, Gunnur Deniz, Raffaele De Palma, and Talal A. Chatila**

## Supplementary Materials

### **Notch4 signaling limits regulatory T cell mediated tissue repair and promotes severe lung inflammation in viral infections**

Hani Harb<sup>1,2\*</sup>, Mehdi Benamar<sup>1,2\*</sup>, Peggy S. Lai<sup>3,4\*</sup>, Paola Contini<sup>5</sup>, Jason W. Griffith<sup>3,4</sup>, Elena Crestani<sup>1,2</sup>, Klaus Schmitz-Abe<sup>1,2</sup>, Qian Chen<sup>1,2</sup>, Jason Fong<sup>1,2</sup>, Luca Marri<sup>5</sup>, Gilberto Filaci<sup>6</sup>, Genny Del Zotto<sup>7</sup>, Novalia Pishesha<sup>2,8</sup>, Stephen Kolifrath<sup>2,8</sup>, Achille Broggi<sup>1,2</sup>, Sreya Ghosh<sup>1,2</sup>, Metin Yusuf Gelmez<sup>9</sup>, Fatma Betul Oktelik<sup>9</sup>, Esin Aktas Cetin<sup>9</sup>, Ayca Kiykim<sup>10</sup>, Murat Kose<sup>11</sup>, Ziwei Wang<sup>1,2</sup>, Ye Cui<sup>1,2</sup>, Xu G. Yu<sup>12</sup>, Jonathan Z. Li<sup>13</sup>, Lorenzo Berra<sup>14</sup>, Emmanuel Stephen-Victor<sup>1,2</sup>, Louis-Marie Charbonnier<sup>1,2</sup>, Ivan Zanoni<sup>1,2</sup>, Hidde Ploegh<sup>2,8</sup>, Gunnur Deniz<sup>9</sup>, Raffaele De Palma<sup>5,15†</sup>, Talal A. Chatila<sup>1,2†</sup>

<sup>1</sup>Division of Immunology, Boston Children's Hospital, Boston, Massachusetts, USA;

<sup>2</sup>Department of Pediatrics, Harvard Medical School, Boston, Massachusetts, USA;

<sup>3</sup>Division of Pulmonary and Critical Care, Massachusetts General Hospital, Boston, Massachusetts, USA; <sup>4</sup>Department of Medicine, Harvard Medical School, Boston, Massachusetts, USA;

<sup>5</sup>Unit of Clinical Immunology and Translational Medicine, IRCCS Ospedale Policlinico San Martino, Genoa, Italy; <sup>6</sup>Biotherapy Unit, IRCCS Ospedale Policlinico San Martino, Genoa, Italy;

<sup>7</sup>Department of Research and Diagnostics, IRCCS Istituto Giannina Gaslini, Genoa, Italy; <sup>8</sup>Program in Cellular and Molecular Medicine, Boston Children's Hospital, Boston, Massachusetts, USA;

<sup>9</sup>Department of Immunology, Aziz Sancar Institute of Experimental Medicine (Aziz Sancar DETAE), Istanbul University,

Istanbul, Turkey; <sup>10</sup>Division of Pediatric Allergy and Immunology, Faculty of Medicine, Istanbul University-Cerrahpasa, Istanbul, Turkey; <sup>11</sup>Department of Internal Medicine, Faculty of Medicine, Istanbul University, Istanbul, Turkey; <sup>12</sup>Ragon Institute of Massachusetts General Hospital, Massachusetts Institute of Technology and Harvard Medical School, Boston, Massachusetts, USA; <sup>13</sup>Division of Infectious Diseases, Brigham and Women's Hospital, Harvard Medical School, Boston, Massachusetts, USA; <sup>14</sup>Department of Anaesthesia, Critical Care and Pain Medicine, Massachusetts General Hospital, Harvard Medical School, Boston, Massachusetts, USA; <sup>15</sup>CNR-Institute of Biomolecular Chemistry (IBC), Via Campi Flegrei 34, 80078 Pozzuoli, Napoli, Italy.

\* These authors contributed equally

† These authors contributed equally

**Corresponding Author:** Talal A. Chatila, M.D., M.Sc., Division of Immunology, Boston Children's Hospital, Department of Pediatrics, Harvard Medical School, Boston, MA, USA.

Email: [talal.chatila@childrens.harvard.edu](mailto:talal.chatila@childrens.harvard.edu)

### **Supplementary Figure Legends.**

**Fig. S1. Expression of Notch1, Notch2 and Notch3 on circulating Treg cells of control and COVID-19 subjects.** Related to Figure 1. **A-C** Flow cytometric analysis and graphical representation of Notch1 (A), Notch2 (B) and Notch3 (C) expression in Treg cells of control and COVID-19 subject groups. Each symbol represents one subject. Numbers in flow plots indicate percentages. Error bars indicate SEM. Statistical tests: One-way ANOVA with Dunnett's post hoc analysis.

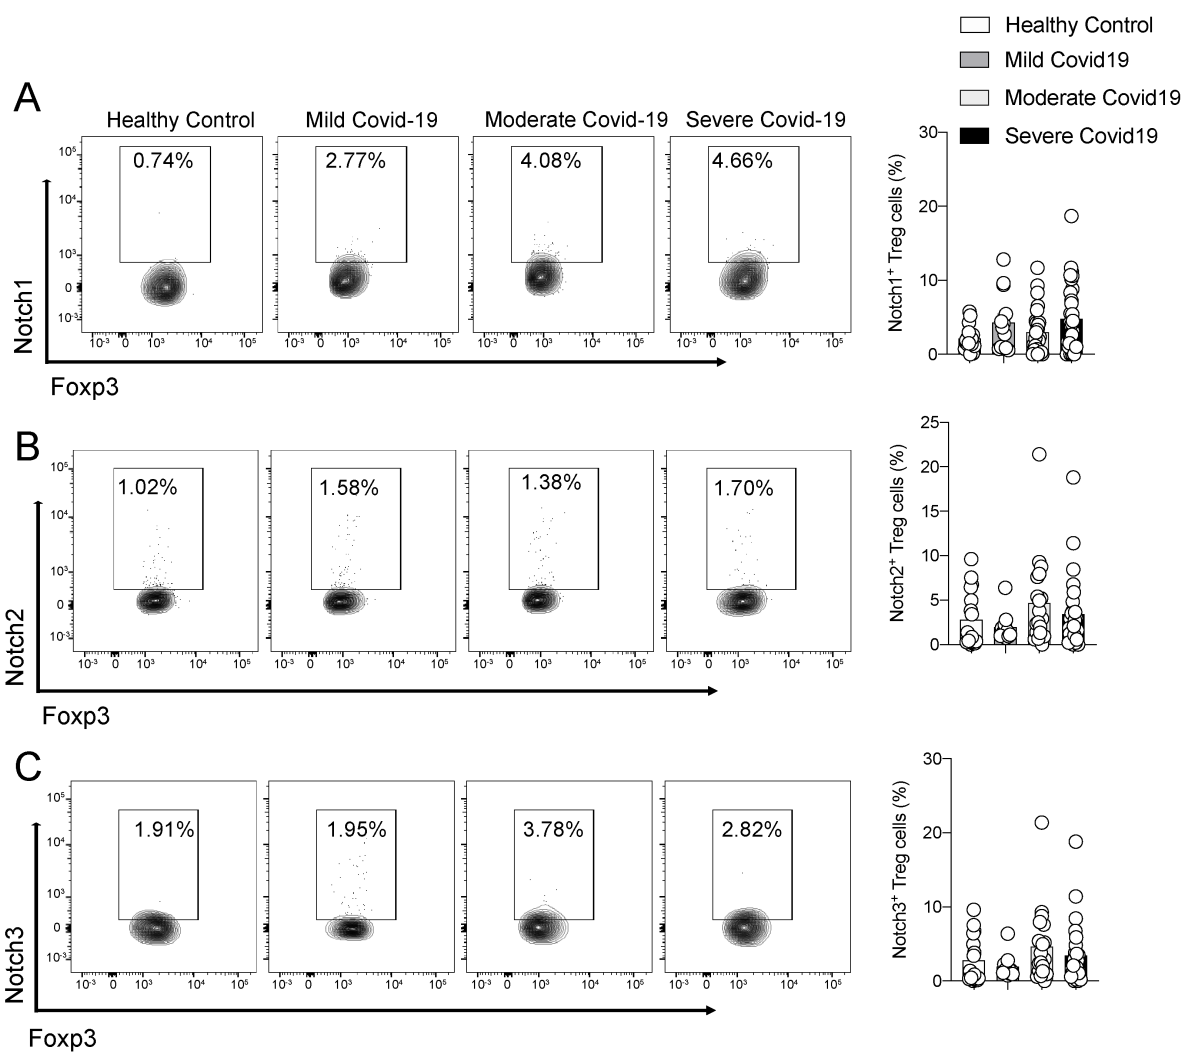

**Fig. S2. Impact of Treg cell-specific deletion of different Notch, Hippo and Wnt pathway components on poly I:C-induced lung injury.** Related to Figure 2. **A, B,** Weight index (A) and peak weight loss (B) of *Foxp3*<sup>YFPCre</sup>, *Foxp3*<sup>YFPCre</sup>*Rbpj*<sup>Δ/Δ</sup>, *Foxp3*<sup>YFPCre</sup>*Notch1*<sup>Δ/Δ</sup>, *Foxp3*<sup>YFPCre</sup>*Notch2*<sup>Δ/Δ</sup> and *Foxp3*<sup>YFPCre</sup>*Notch3*<sup>Δ/Δ</sup> mice either sham-treated or treated with poly I:C, as indicated. **C,** AHR in the respective mouse groups in response to methacholine. **D-F,** Graphical representation of lung tissue neutrophils (D) and M1 (E) and M2 macrophages (F). **G, H,** Flow cytometric analysis (G) and graphical representation (H) of Yap and β-Catenin in lung tissue Treg cells of *Foxp3*<sup>YFPCre</sup> mice that were either sham-treated or treated with poly I:C. **I, J,** Weight index (I) and peak weight loss (J) of *Foxp3*<sup>YFPCre</sup>, *Foxp3*<sup>YFPCre</sup>*Yap1*<sup>Δ/Δ</sup>*Wwtr1*<sup>Δ/Δ</sup>, *Foxp3*<sup>YFPCre</sup>*Ctnnb1*<sup>Δ/Δ</sup> and *Foxp3*<sup>YFPCre</sup>*Yap1*<sup>Δ/Δ</sup>*Wwtr1*<sup>Δ/Δ</sup> *Ctnnb1*<sup>Δ/Δ</sup> mice either sham-treated or treated with Poly I:C, as indicated. **K,** AHR in the respective mouse groups in response to methacholine. **L-N,** Graphical representation of lung tissue neutrophils (L) and M1 (M) and M2 (N) macrophages. Each symbol represents one mouse (n=5 per group). Numbers in flow plots indicate percentages. Error bars indicate SEM. Statistical tests: Two-way ANOVA with Sidak's post hoc analysis (**A,C,I,K**); One-way ANOVA with Dunnett's post hoc analysis (**B,D,E,F,J,L,M,N**);. \*\*P<0.01, \*\*\*P<0.001, \*\*\*\*P<0.0001.

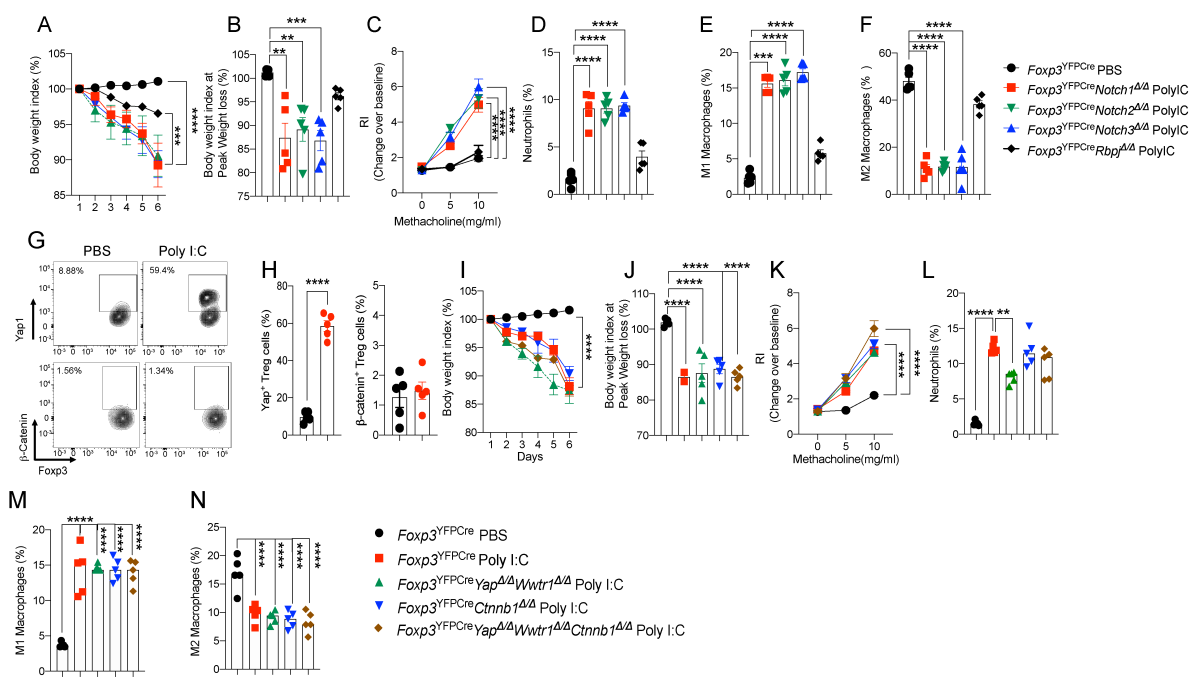

**Fig. S3. Treg cell-specific deletion of *Il6ra* partially protects against Poly I:C-induced lung injury.** Related to Figure 2. **A**, BAL concentrations of IFN $\gamma$ , TNF $\alpha$ , IL-12p70, IL-1 $\beta$ , IFN $\beta$ , IL-10, IL-1 $\alpha$ , MCP-1, IL-27, GM-CSF, IL-17, OSM, LIF and CXCL5 in PBS or Poly I:C-treated *Foxp3*<sup>YFPCre</sup> and *Foxp3*<sup>YFPCre</sup>*Notch4* <sup>$\Delta/\Delta$</sup>  mice, the former also co-treated with either isotype control or anti-Notch4 mAb. **B**, Weight index (A) and peak weight loss of *Foxp3*<sup>YFPCre</sup> and *Foxp3*<sup>YFPCre</sup>*Il6ra* <sup>$\Delta/\Delta$</sup>  mice either sham-treated or treated with Poly I:C, as indicated. **C**, AHR in response to methacholine. **D, E**, Flow cytometric analysis (D) and graphical representation (E) of Notch4 expression in lung tissue Treg cells of *Foxp3*<sup>YFPCre</sup> and *Foxp3*<sup>YFPCre</sup>*Il6ra* <sup>$\Delta/\Delta$</sup>  mice that were either sham-treated or treated with Poly I:C. **F-H**, Flow cytometric analysis and graphical representation of lung tissue neutrophils (F) and M1 (G) and M2 macrophages (H). Each symbol represents one mouse (n=5 per group). Numbers in flow plots indicate percentages. Error bars indicate SEM. Statistical tests: Two-way ANOVA with Sidak's post hoc analysis (**A,C**); One-way ANOVA with Dunnett's post hoc analysis (**B,E,F,G,H**); \*\*P<0.01, \*\*\*\*P<0.0001.



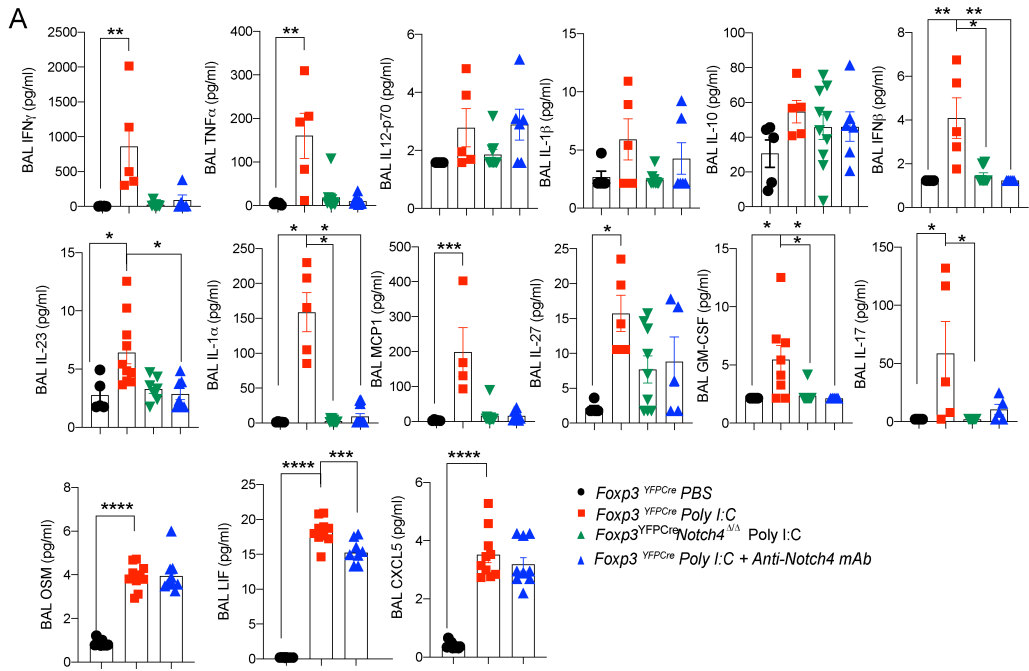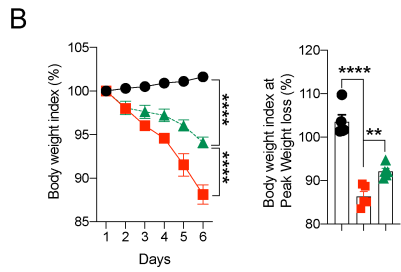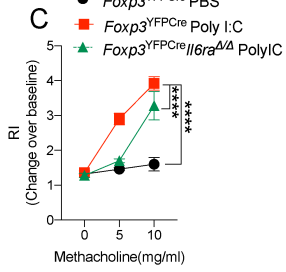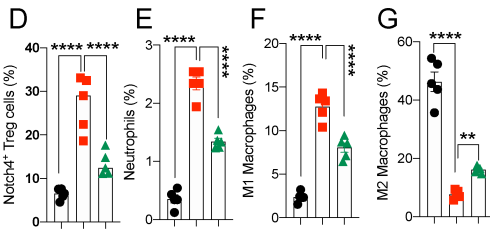

**Fig. S4. Protective effect of Notch4 inhibition in influenza A H1N1 virus infection.**

Related to Figure 3. **A**, Flow cytometric analysis (A) and graphical representation of lung neutrophils in the indicated mouse groups. **B**, Flow cytometric analysis and graphical representation of lung M2 macrophages in the indicated mouse groups. **C**, Flow cytometric analysis and graphical representation and graphical representation of lung M1 macrophages in the indicated mouse groups. **D**, BAL concentrations of IFN $\gamma$ , TNF $\alpha$ , IL-12p70, IL-1 $\beta$ , IFN $\beta$ , IL-10, IL-1 $\alpha$ , MCP-1, IL-27, GM-CSF, IL-17, OSM, LIF and CXCL5 in PBS or H1N1-infected *Foxp3*<sup>YFPCre</sup> and *Foxp3*<sup>YFPCre</sup>*Notch4* <sup>$\Delta/\Delta$</sup>  mice, the former also co-treated with either isotype control or anti-Notch4 mAb. Each symbol represents one mouse (n=5 per group). Numbers in flow plots indicate percentages. Error bars indicate SEM. Statistical tests: One-way ANOVA with Dunnett's post hoc analysis (**A-D**). \*\*P<0.01, \*\*\*P<0.001, \*\*\*\*P<0.0001.

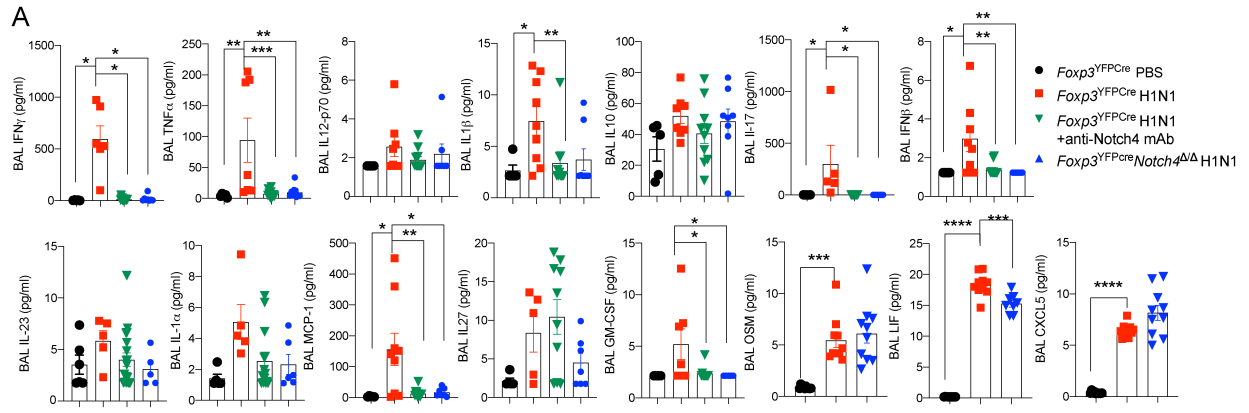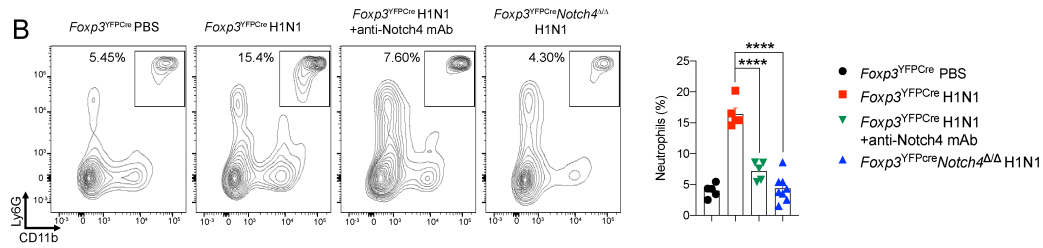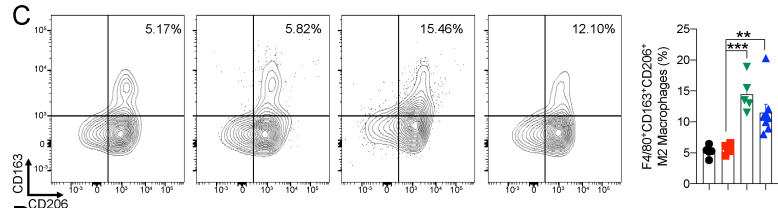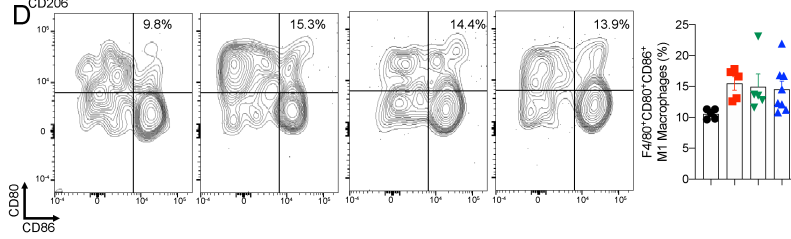

**Fig. S5. Characterization of lung T cell infiltrates in H1N1 infected mice.** Related to Figure 3. **A,B**, Graphical representation of CD8<sup>+</sup> T cell frequencies (A) and IFN $\gamma$ <sup>+</sup>CD8<sup>+</sup> T cell frequencies and numbers (B) in the lungs of *Foxp3*<sup>YFPCre</sup> and *Foxp3*<sup>YFPCre</sup>*Notch4* $\Delta/\Delta$  mice that were either sham-treated or infected with H1N1 virus, in the case of the *Foxp3*<sup>YFPCre</sup> mice either alone or together with an anti-Notch4 mAb, as indicated. **C,D**, Graphical representation of CD4<sup>+</sup> T cell frequencies (C) and IFN $\gamma$ <sup>+</sup>CD4<sup>+</sup> Teff cell frequencies and numbers (D) in the lungs. **E**, Graphical representation of IFN $\gamma$ <sup>+</sup> Macrophage frequencies and numbers. **F**, Graphical representation of IFN $\gamma$ <sup>+</sup>ILC1 frequencies and numbers. **G**, Graphical representation of IL-17<sup>+</sup>CD8<sup>+</sup> T cell frequencies and numbers in the lungs. **H**, Graphical representation of IL-17<sup>+</sup>CD4<sup>+</sup> T cell frequencies and numbers in the lungs. Each symbol represents one mouse (n=5 per group). Error bars indicate SEM. Statistical tests: One-way ANOVA with Dunnett's post hoc analysis (**A-H**). \*P<0.05, \*\*\*P<0.001, \*\*\*\*P<0.0001.

• *Foxp3<sup>YFPcre</sup>PBS*    • *Foxp3<sup>YFPcre</sup>H1N1*    • *Foxp3<sup>YFPcre</sup>H1N1 +anti-Notch4mAB*    • *Foxp3<sup>YFPcre</sup> Notch4<sup>Δ/Δ</sup>H1N1*

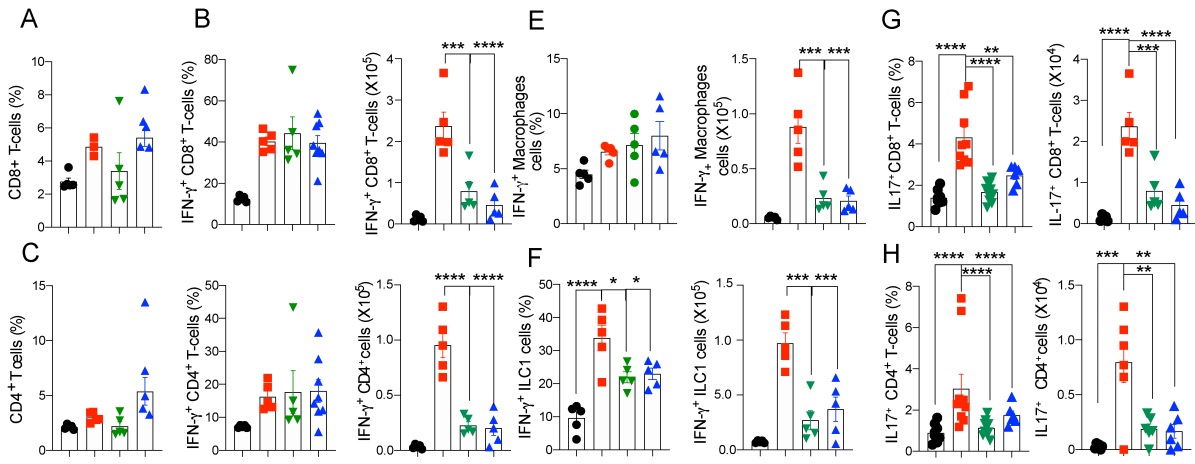

**Fig. S6. Validation of neutralizing anti-human Notch4 mAbs and amphiregulin<sub>91-140</sub> blocking peptide.** Related to Figures 4 and 7. **A.** Reactivity of different Notch4 mAbs to Notch1, Notch2, Notch3 and Notch4 as measured by ELISA. **B, Left,** Flow cytometric analysis Jagged1-Notch4<sup>GFP</sup> interaction in Jurkat cells that were either sham transfected (control) or transfected with a construct encoding Notch4<sup>GFP</sup> then incubated with Jagged1 in the absence or presence of the indicated mAb. **B right,** Flow cytometric analysis and graphical representation of Jagged1-PE staining of Jurkat cells that were transfected with a construct encoding Notch4<sup>GFP</sup> in the absence or presence of the indicated mAb. **C,** Flow cytometric analysis and graphical representation of EGFR phosphorylation at tyrosine 1068 (pEGFR) in HEK293 cells treated with mouse amphiregulin in the presence increased concentrations of amphiregulin<sub>91-140</sub> blocking peptide (bp) or a neutralizing anti-amphiregulin mAb, as indicated. **D,** Weight index and peak weight loss of *Foxp3*<sup>YFPCre</sup> and *Foxp3*<sup>YFPCre</sup>*Notch4*<sup>Δ/Δ</sup> mice treated with Poly I:C, either alone or together with anti-amphiregulin neutralizing mAb. **E,** Frequencies of neutrophils and M1 and M2 macrophages in lung tissues. **F,** Serum tetramethylrhodamine isothiocyanate (TRITC) dextran, measured as relative fluorescent units (RFU), in Poly I:C + anti-Amphiregulin mAb-treated *Foxp3*<sup>YFPCre</sup> or *Foxp3*<sup>YFPCre</sup>*Notch4*<sup>Δ/Δ</sup> mice at 1-hour post intra-tracheal instillation. **G,** Frequencies of neutrophils and M1 and M2 macrophages in lung tissues from *Foxp3*<sup>YFPCre</sup> mice either sham treated or treated with Poly I:C, either alone or together with amphiregulin bp. **H,** frequencies of M1 and M2 macrophages in co-cultures of Poly I:C-treated lung macrophages incubated either alone, with amphiregulin, Treg cells from Poly I:C-treated *Foxp3*<sup>YFPCre</sup> mice or the combination thereof. Each symbol represents one mouse (n=5-10 per group). Numbers in flow plots indicate percentages.

Error bars indicate SEM. Statistical tests: One-way ANOVA with Dunnett's post hoc analysis (**D-F**); two-way ANOVA with Sidak's post hoc analysis (**D**) ; Student's two tailed *t*-test (**G**). \*\* $P < 0.01$ , \*\*\*\* $P < 0.0001$ ).

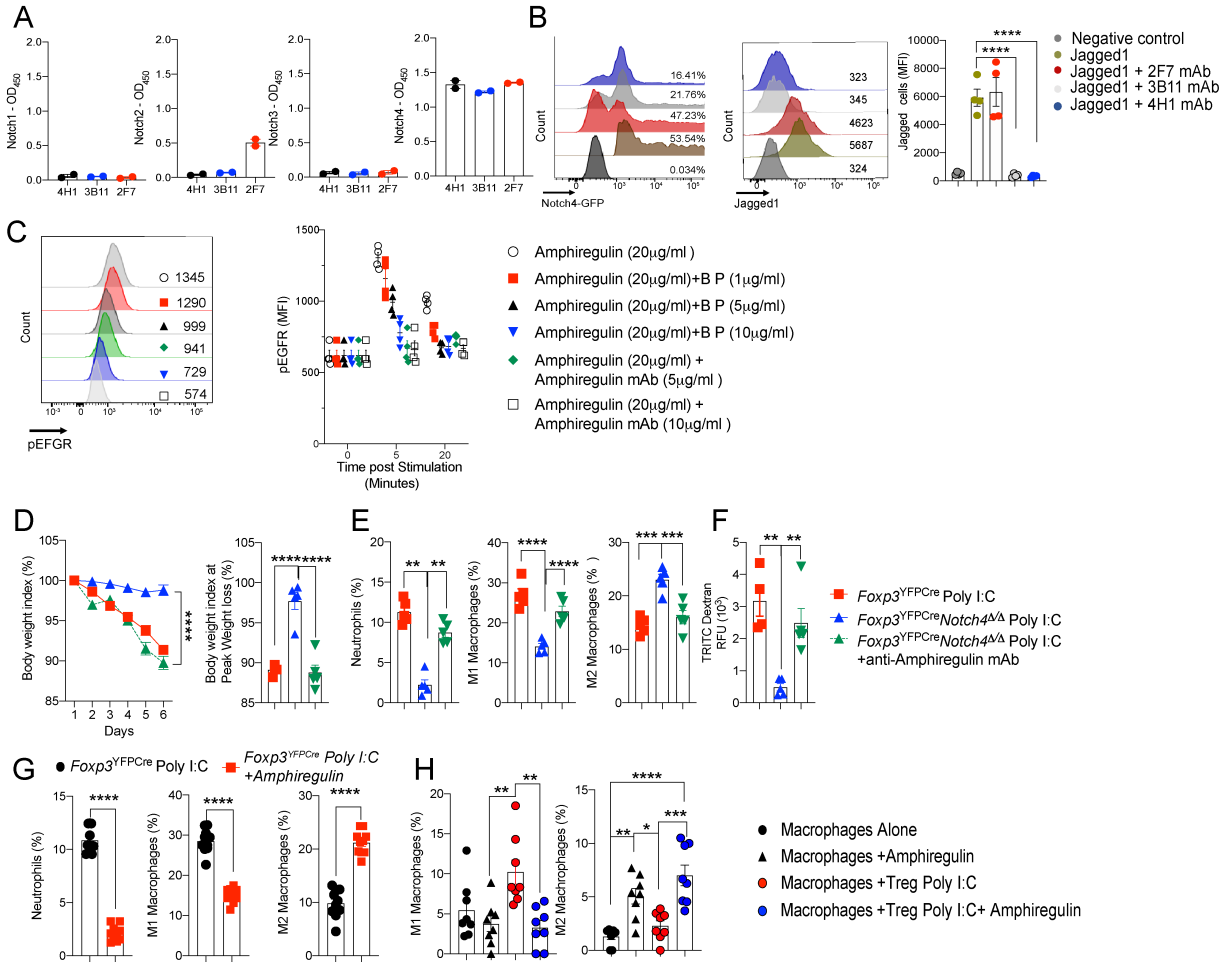



**Table S1. Demographics of COVID-19 patients stratified by disease severity and predictors of mortality.** Related to Figure 1

**Table S1. Demographics of COVID-19 patients stratified by disease severity and predictors of mortality.**

|                             | Overall        | Mild            | Moderate      | Severe          | p-value |
|-----------------------------|----------------|-----------------|---------------|-----------------|---------|
| n                           | 118            | 20              | 57            | 41              |         |
| Site, n (%)                 |                |                 |               |                 | <0.001  |
| Boston                      | 38 (32.2)      | 2 (10.0)        | 17 (29.8)     | 19 (46.3)       |         |
| Genoa                       | 44 (37.3)      | 0 (0.0)         | 28 (49.1)     | 16 (39.0)       |         |
| Istanbul                    | 36 (30.5)      | 18 (90.0)       | 12 (21.1)     | 6 (14.6)        |         |
| Age, mean (SD)              | 63.12 (18.97)  | 42.60 (15.22)   | 65.21 (17.39) | 70.22 (15.83)   | <0.001  |
| Male, n (%)                 | 63 (53.4)      | 9 (45.0)        | 25 (43.9)     | 29 (70.7)       | 0.022   |
| White, n (%)                | 108 (91.5)     | 18 (90.0)       | 53 (93.0)     | 37 (90.2)       | 0.859   |
| BMI, mean (SD)              | 28.57 (6.88)   | 26.94 (3.94)    | 27.98 (6.05)  | 30.18 (8.69)    | 0.151   |
| Any medical problems, n (%) | 95 (81.2)      | 8 (40.0)        | 49 (86.0)     | 38 (95.0)       | <0.001  |
| Immunosuppression           | 16 (13.6)      | 1 (5.0)         | 6 (10.5)      | 9 (22.0)        | 0.125   |
| Malignancy                  | 22 (18.6)      | 1 (5.0)         | 10 (17.5)     | 11 (26.8)       | 0.116   |
| Pulmonary disease           | 33 (28.0)      | 2 (10.0)        | 17 (29.8)     | 14 (34.1)       | 0.13    |
| Cardiac disease             | 70 (59.3)      | 4 (20.0)        | 32 (56.1)     | 34 (82.9)       | <0.001  |
| Hypertension                | 55 (46.6)      | 4 (20.0)        | 24 (42.1)     | 27 (65.9)       | 0.002   |
| Hyperlipidemia              | 12 (10.2)      | 0 (0.0)         | 6 (10.5)      | 6 (14.6)        | 0.205   |
| Endocrine disease           | 38 (32.5)      | 2 (10.0)        | 19 (33.3)     | 17 (42.5)       | 0.04    |
| Diabetes                    | 26 (22.0)      | 1 (5.0)         | 14 (24.6)     | 11 (26.8)       | 0.126   |
| COVID-19 treatments         |                |                 |               |                 |         |
| Remdesivir                  | 26 (22.0)      | 0 (0.0)         | 8 (14.0)      | 18 (43.9)       | <0.001  |
| Hydroxychloroquine          | 54 (45.8)      | 15 (75.0)       | 24 (42.1)     | 15 (36.6)       | 0.014   |
| Glucocorticoids             | 67 (56.8)      | 0 (0.0)         | 35 (61.4)     | 32 (78.0)       | <0.001  |
| Anti-IL-6                   | 9 (7.6)        | 0 (0.0)         | 2 (3.5)       | 7 (17.1)        | 0.016   |
| Supportive care             |                |                 |               |                 |         |
| Supplemental oxygen         | 89 (75.4)      | 9 (45.0)        | 50 (87.7)     | 30 (73.2)       | 0.001   |
| High flow oxygen            | 23 (19.5)      | 0 (0.0)         | 0 (0.0)       | 23 (56.1)       | <0.001  |
| Noninvasive ventilation     | 8 (6.8)        | 0 (0.0)         | 0 (0.0)       | 8 (19.5)        | <0.001  |
| Mechanical ventilation      | 20 (16.9)      | 0 (0.0)         | 0 (0.0)       | 20 (48.8)       | <0.001  |
| ECMO                        | 2 (1.7)        | 0 (0.0)         | 0 (0.0)       | 2 (4.9)         | 0.148   |
| Dead                        | 19 (16.1)      | 0 (0.0)         | 5 (8.8)       | 14 (34.1)       | <0.001  |
| 30-day, n (%)               | 8 (6.8)        | 0 (0.0)         | 0 (0.0)       | 8 (19.5)        | <0.001  |
| 90-day, n (%)               | 18 (15.3)      | 0 (0.0)         | 4 (7.0)       | 14 (34.1)       | <0.001  |
| Biomarkers, mean (SD)       |                |                 |               |                 |         |
| Notch4, %                   | 15.00 (14.48)  | 4.67 (5.57)     | 10.82 (10.93) | 25.84 (15.24)   | <0.001  |
| IL-6, pg/mL                 | 89.10 (209.25) | 124.22 (172.49) | 43.15 (38.47) | 137.70 (326.22) | 0.071   |

|                      | Crude OR | 95% CI          | p-value | Adjusted OR | 95% CI          | P=    |
|----------------------|----------|-----------------|---------|-------------|-----------------|-------|
| Age, years           | 1.086    | (1.044, 1.140)  | <0.001  | 1.094       | (1.036, 1.177)  | 0.005 |
| Male gender          | 1.613    | (0.598, 4.654)  | 0.354   | 3.713       | (0.942, 17.922) | 0.076 |
| History malignancy   | 5.954    | (2.028, 17.718) | 0.001   | 3.717       | (0.950, 15.565) | 0.062 |
| Steroid treatment    | 5.020    | (1.552, 22.55)  | 0.015   | 5.730       | (1.177, 45.520) | 0.053 |
| Notch4, %            | 1.052    | (1.020, 1.088)  | 0.002   | 1.046       | (1.008, 1.090)  | 0.023 |
| Interleukin-6, pg/mL | 0.999    | (0.992, 1.001)  | 0.553   | 1.000       | (0.993, 1.004)  | 0.883 |

Disease severity classification. Mild = did not require hospitalization. Moderate = hospitalized but required only supplemental oxygen. Severe = hospitalized and required high flow oxygen, non-invasive ventilation, or mechanical ventilation.

Abbreviations: BMI = body mass index; ICU = intensive care unit; Anti-IL-6 = anti-interleukin-6 monoclonal antibody therapy; ECMO = extracorporeal membrane oxygenation; IL-6 = interleukin-6, OR = Odds Ratio. 95% CI = 95% confidence interval.
